# Supplementary material for: Oxidative Stress Triggers Selective tRNA Retrograde Transport in Human Cells during the Integrated Stress Response
Source: PubMed Central journal article supplement (PMC6426654; doi:10.1016/j.celrep.2019.02.077), 2019-03-19
Supplement: mmc1.pdf [file mmc1.pdf]

**Cell Reports, Volume 26**

**Supplemental Information**

**Oxidative Stress Triggers Selective  
tRNA Retrograde Transport in Human Cells  
during the Integrated Stress Response**

**Hagen Schwenzer, Frank Jühling, Alexander Chu, Laura J. Pallett, Thomas F. Baumert, Mala Maini, and Ariberto Fassati**

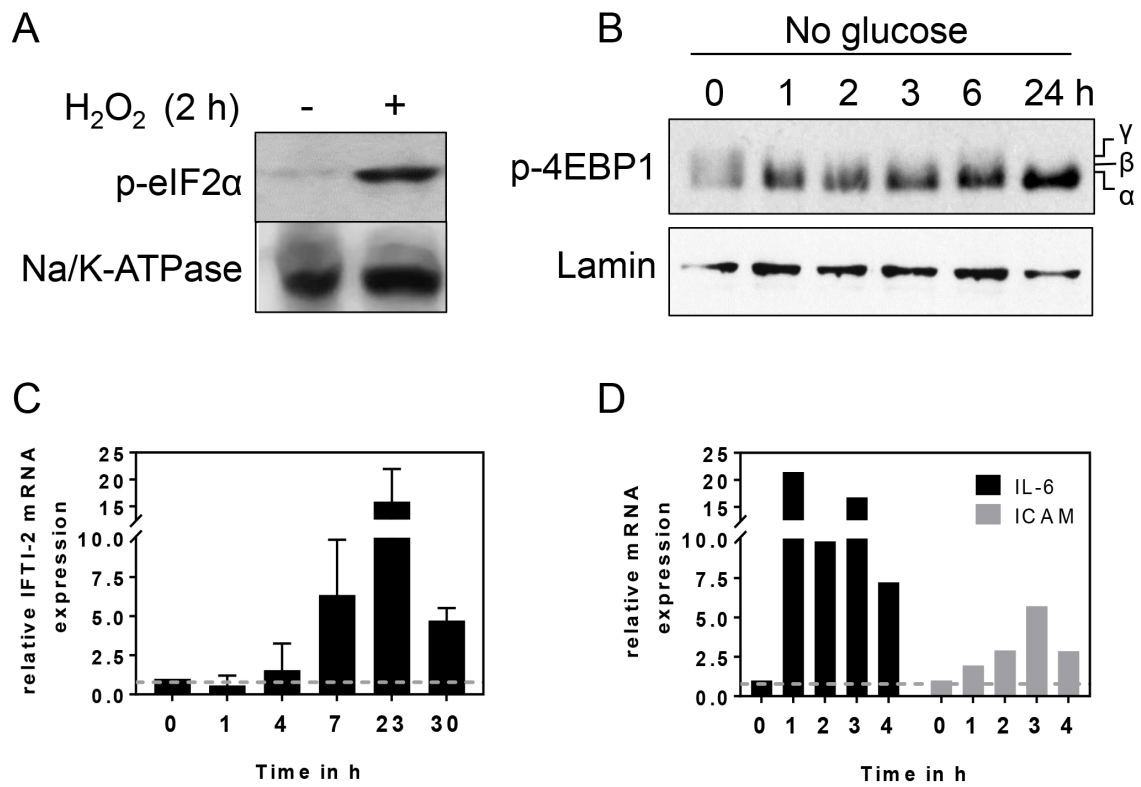

Figure S1 (related to Figure 1). Detection of cellular stress markers.

(A) Western blot to detect S51 phosphorylated eIF2 $\alpha$  (p-eIF2 $\alpha$ ) after treatment with 5 mM H<sub>2</sub>O<sub>2</sub> for 2 hours. (B) Western blot to detect changes in 4EBP1 phosphorylation at different time points in response to glucose deprivation, lamin was used as a loading control. (C) RT qPCR to measure IFTI-2 mRNA levels in response to IFN $\alpha$  (1.25 x10<sup>4</sup> U/ml). (D) Same as (C) to measure IL-6 and ICAM mRNA levels upon treatment with TNF $\alpha$  (1ng/ml). Values are expressed relative to GAPDH mRNA as mean  $\pm$  SEM.

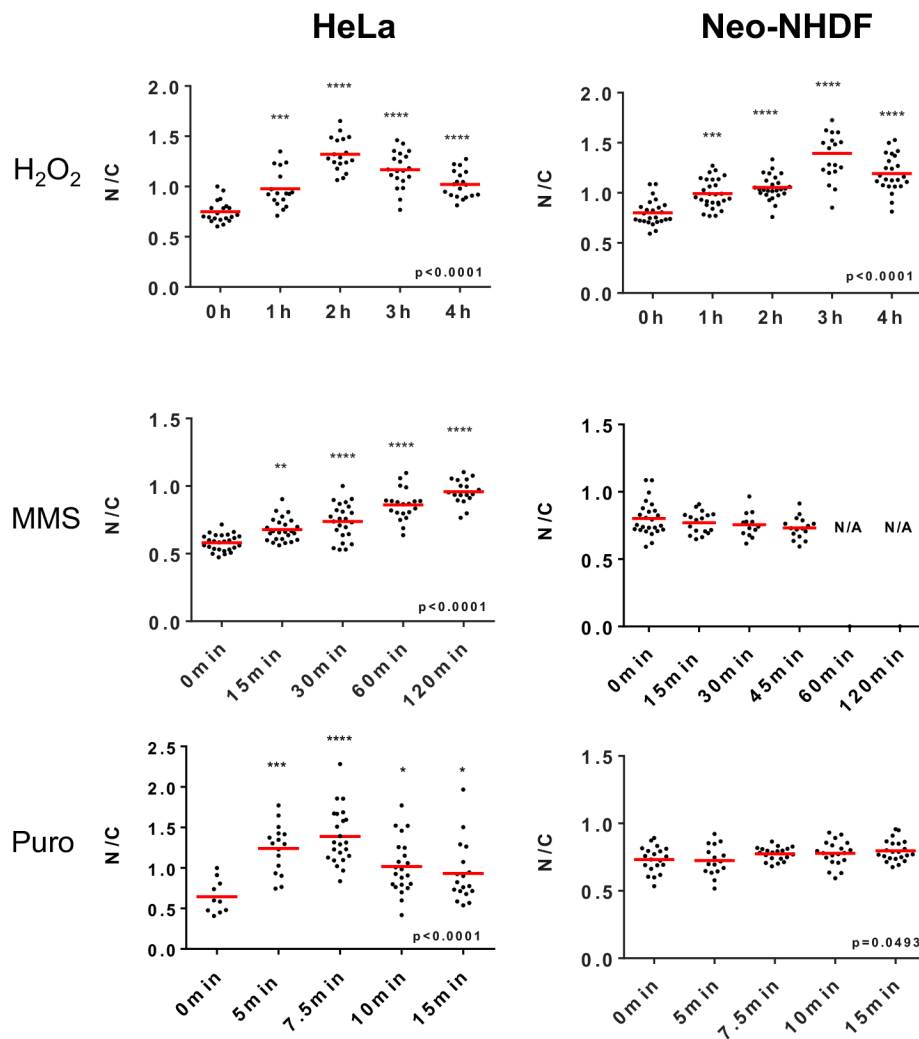

Figure S2 (related to Figure 2). Kinetics of tRNA retrograde transport in HeLa and NHDF cells.

Cells were treated with 5 mM  $\text{H}_2\text{O}_2$  or 5 mM MMS or 3 mM puromycin for the indicated time points and analyzed by tFISH and confocal microscopy. ImageJ software was used to quantify the fluorescent signal in the nucleus (N) and cytoplasm (C) and calculate the N/C ratio. Cells were counted from at least 5 randomly chosen images. Each dot corresponds to one cell. Red lines indicate the mean value. Graphs show data from one representative experiment ( $n \geq 3$ ). One-way Anova (Dunnett's multiple comparisons test) was used to calculate statistical significance \* $p=0.05$ ; \*\* $p<0.05$ ; \*\*\* $p<0.0001$ . N/A, not enough cells for quantification due to toxicity.

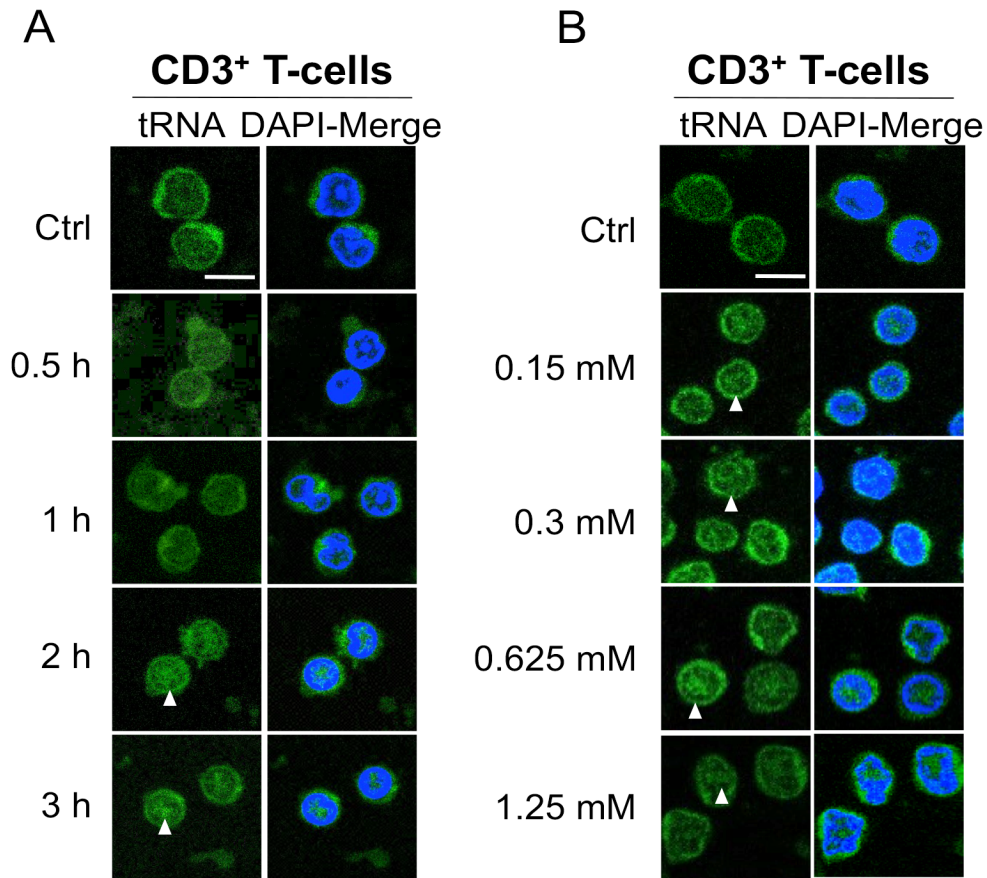

Figure S3 (related to Figure 2). Time and dose dependent induction of tRNA retrograde transport in primary CD3<sup>+</sup> T-cells.

(A) Magnetic-bead purified T-cells were exposed to 0.6 mM H<sub>2</sub>O<sub>2</sub> and incubated for the indicated period of time before analysis by tFISH. Representative confocal microscopy images from one donor are shown. Similar results were obtained with a second donor. (B) T-cells were exposed for 2 hours to the indicated concentrations of H<sub>2</sub>O<sub>2</sub> and analysed by tFISH and confocal microscopy. Representative confocal microscopy images are shown. Increasing concentrations of H<sub>2</sub>O<sub>2</sub> led to an increase of the tRNA signal in the nucleus. The signal intensity rose until plateau was reached, afterwards the overall fluorescence intensity decreased and frequent cell death was observed. Representative images from one donor are shown. Similar results were obtained with a second donor. Arrowheads point to intra-nuclear signal. Scale bar = 10 μm.

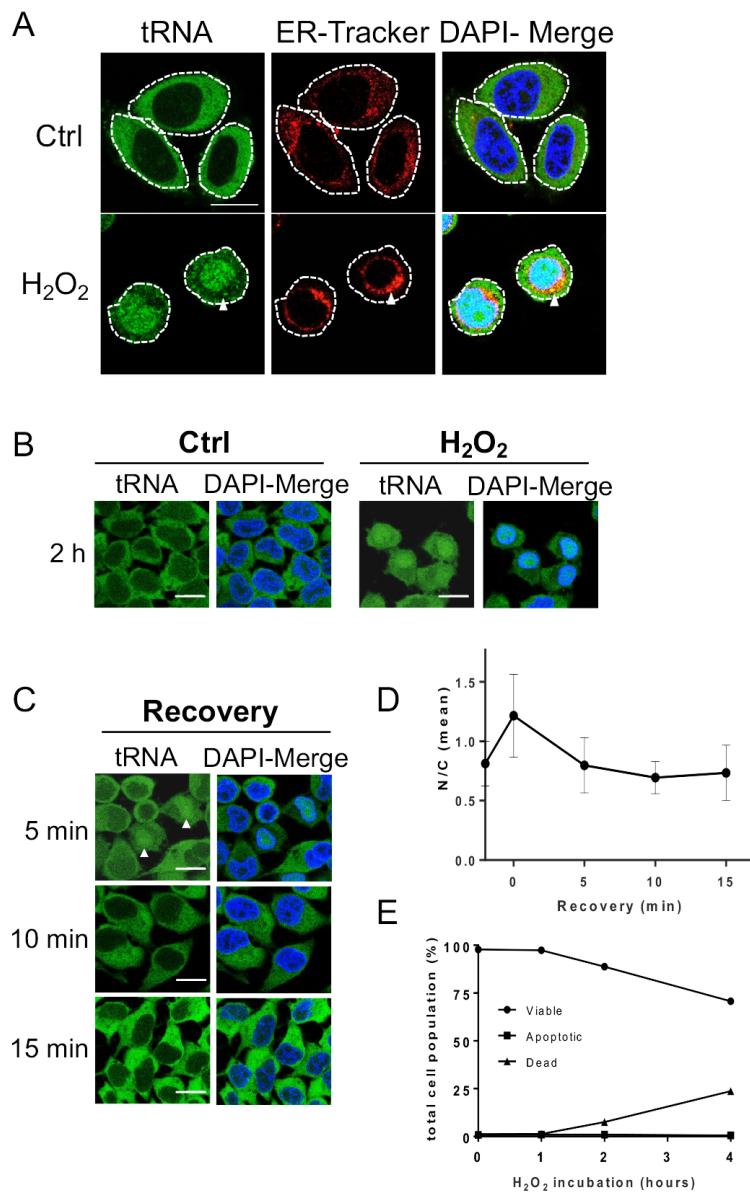

Figure S4 (related to Figure 3). tRNA retrograde transport depletes the ER and is reversible.

(A) Cells were pre-incubated with ActD for 2 hours then 5 mM H<sub>2</sub>O<sub>2</sub> was added for 2 hours. Cells were incubated with ER Tracker™ Red (Molecular Probes) and analysed by tFISH and confocal microscopy. Scale bar = 10µm. Arrowheads indicate the ER. (B-C) Induction of retrograde tRNA transport by H<sub>2</sub>O<sub>2</sub> is reversible. Cells were exposed to 5 mM H<sub>2</sub>O<sub>2</sub> for 2 hours before media was replaced without H<sub>2</sub>O<sub>2</sub> (Recovery) and cells were analyzed by tFISH at the indicated time points. Representative confocal microscopy images are shown (n =3), scale bar = 20µm. Arrow heads indicate nuclei with a positive tFISH signal. (D) The tFISH fluorescent signal intensity in the nucleus and cytoplasm was quantified by ImageJ, the ratio nuclear:cytoplasmic signal (N/C) was calculated and values were plotted as a function of time. Graph shows average values ± SD from three independent experiments. (E) Flow cytometry analysis of apoptotic (annexin stain) and dead (PI stain) cells within the total population of cells treated with 5 mM H<sub>2</sub>O<sub>2</sub>.

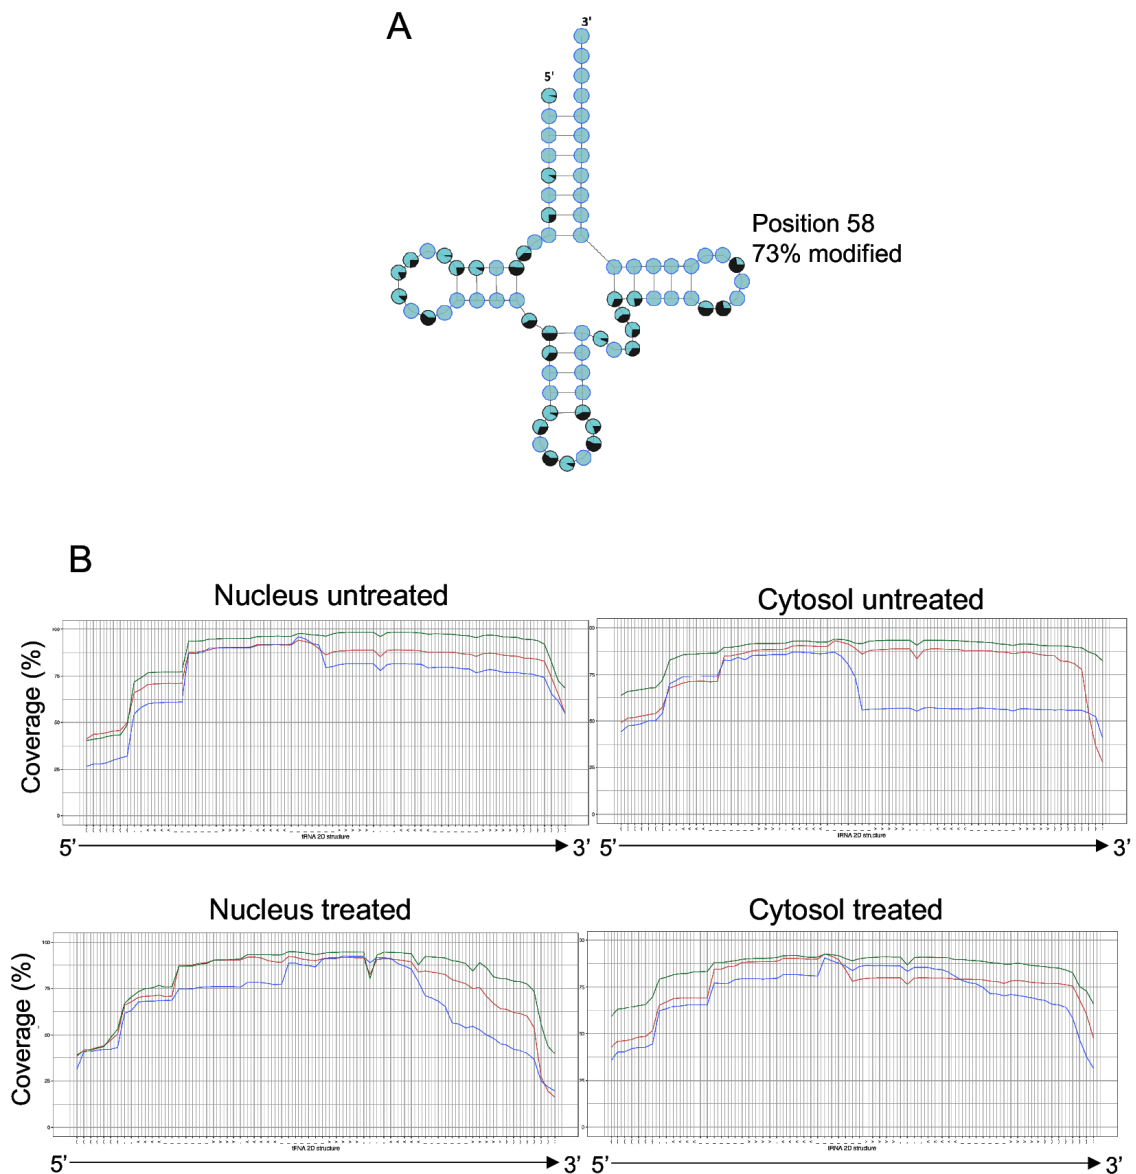

Figure S5 (related to Figure 4). Reduced 5' end coverage did not affect 3' mapping of tRNAs.

(A) Illustration of the secondary structure of the human consensus tRNA model. Each circle represents one nucleotide. Filling of circles represents a pie chart indicating the frequency of known modification at the particular position. Data has been extracted from MODOMICS (<http://modomics.genesilico.pl/>). (B) Alignment of sequences based on covariance model build from ~1000 tRNAs extracted from RFAM. Reads for each position have been counted and divided by total reads. Lines represent the relative coverage normalised to total tRNA reads. Each line represents one biological replicate. Treated, cells exposed for 5 mM H<sub>2</sub>O<sub>2</sub> for 2 hours in the presence of ActD; untreated, cells exposed to ActD only for 2 hours.

A

| Replicates           | nucleus treated |       |       | cytosol treated |       |       | nucleus control |       |       | cytosol control |       |       |
|----------------------|-----------------|-------|-------|-----------------|-------|-------|-----------------|-------|-------|-----------------|-------|-------|
|                      | 1               | 2     | 3     | 1               | 2     | 3     | 1               | 2     | 3     | 1               | 2     | 3     |
| total reads (in Mio) | 11.44           | 11.35 | 11.29 | 15.05           | 13.32 | 9.70  | 7.25            | 8.38  | 6.46  | 10.83           | 14.01 | 7.00  |
| mapped reads (%)     | 66.76           | 46.93 | 5.04  | 58.34           | 13.07 | 0.33  | 73.94           | 88.60 | 3.21  | 79.89           | 27.78 | 2.26  |
| mRNA (%)             | 27.61           | 28.94 | 28.95 | 9.22            | 13.56 | 22.66 | 31.95           | 35.34 | 36.66 | 8.79            | 11.27 | 14.89 |
| ncRNA (%)            | 71.91           | 70.55 | 67.75 | 82.79           | 83.14 | 69.78 | 66.58           | 64.13 | 62.15 | 82.80           | 83.45 | 81.14 |
| tRNA (%)             | 2.14            | 2.21  | 17.18 | 26.01           | 11.92 | 33.40 | 5.64            | 1.94  | 5.12  | 29.08           | 17.19 | 17.24 |

B

| Nucleus    |                           | Cytosol        |                           |
|------------|---------------------------|----------------|---------------------------|
| Ensembl ID | Reads (x10 <sup>3</sup> ) | Ensembl ID     | Reads (x10 <sup>3</sup> ) |
| RNU2-2P    | 869                       | MT-TV          | 418                       |
| SNORA51    | 258                       | CTD-2651B20.6  | 266                       |
| RNU5D-1    | 189                       | CTD-2651B20.7  | 265                       |
| SNORA2B    | 132                       | MT-TQ          | 261                       |
| RNU2-59P   | 120                       | MT-TN          | 236                       |
| SNORA28    | 118                       | RP11-473M20.16 | 233                       |
| SNORD14B   | 114                       | MT-TI          | 225                       |
| SNORA77    | 114                       | MT-TR          | 195                       |
| SNORA6     | 110                       | MT-TE          | 192                       |
| SNORA45    | 102                       | MT-TP          | 168                       |

C

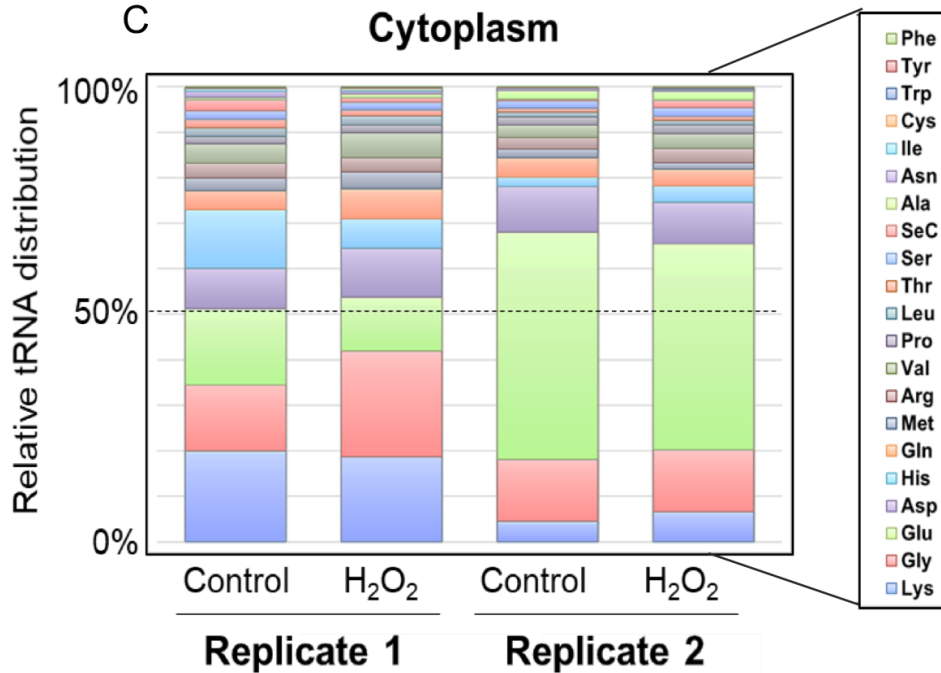

Figure S6 (related to Figure 4). Assessment of the quality of the cellular fractionation and RNAseq.

HeLa cells were treated with 5 mM H<sub>2</sub>O<sub>2</sub> for 2 hours in the presence of ActD and fractionated into nuclear and cytosolic fractions. RNA was extracted from each fraction and used for RNA-Seq. (A) Summary of the mapped RNA reads in each replicate and their distribution in each fraction. (B) Top 10 reads detected in the nuclear and

cytosolic fraction of one representative control replicate. Treated, cells exposed for 5 mM H<sub>2</sub>O<sub>2</sub> for 2 hours in the presence of ActD; untreated, cells exposed to ActD only for 2 hours. (C) Total RNA reads were mapped to 323 unique tRNA genes and all reads mapping to the same tRNA species were counted, combined and their relative distribution calculated. tRNAs were clustered accordingly to their relative abundance in the cytoplasm. The tRNA colour code is the same for nucleus and cytoplasm. See also Tables S1 and S2.



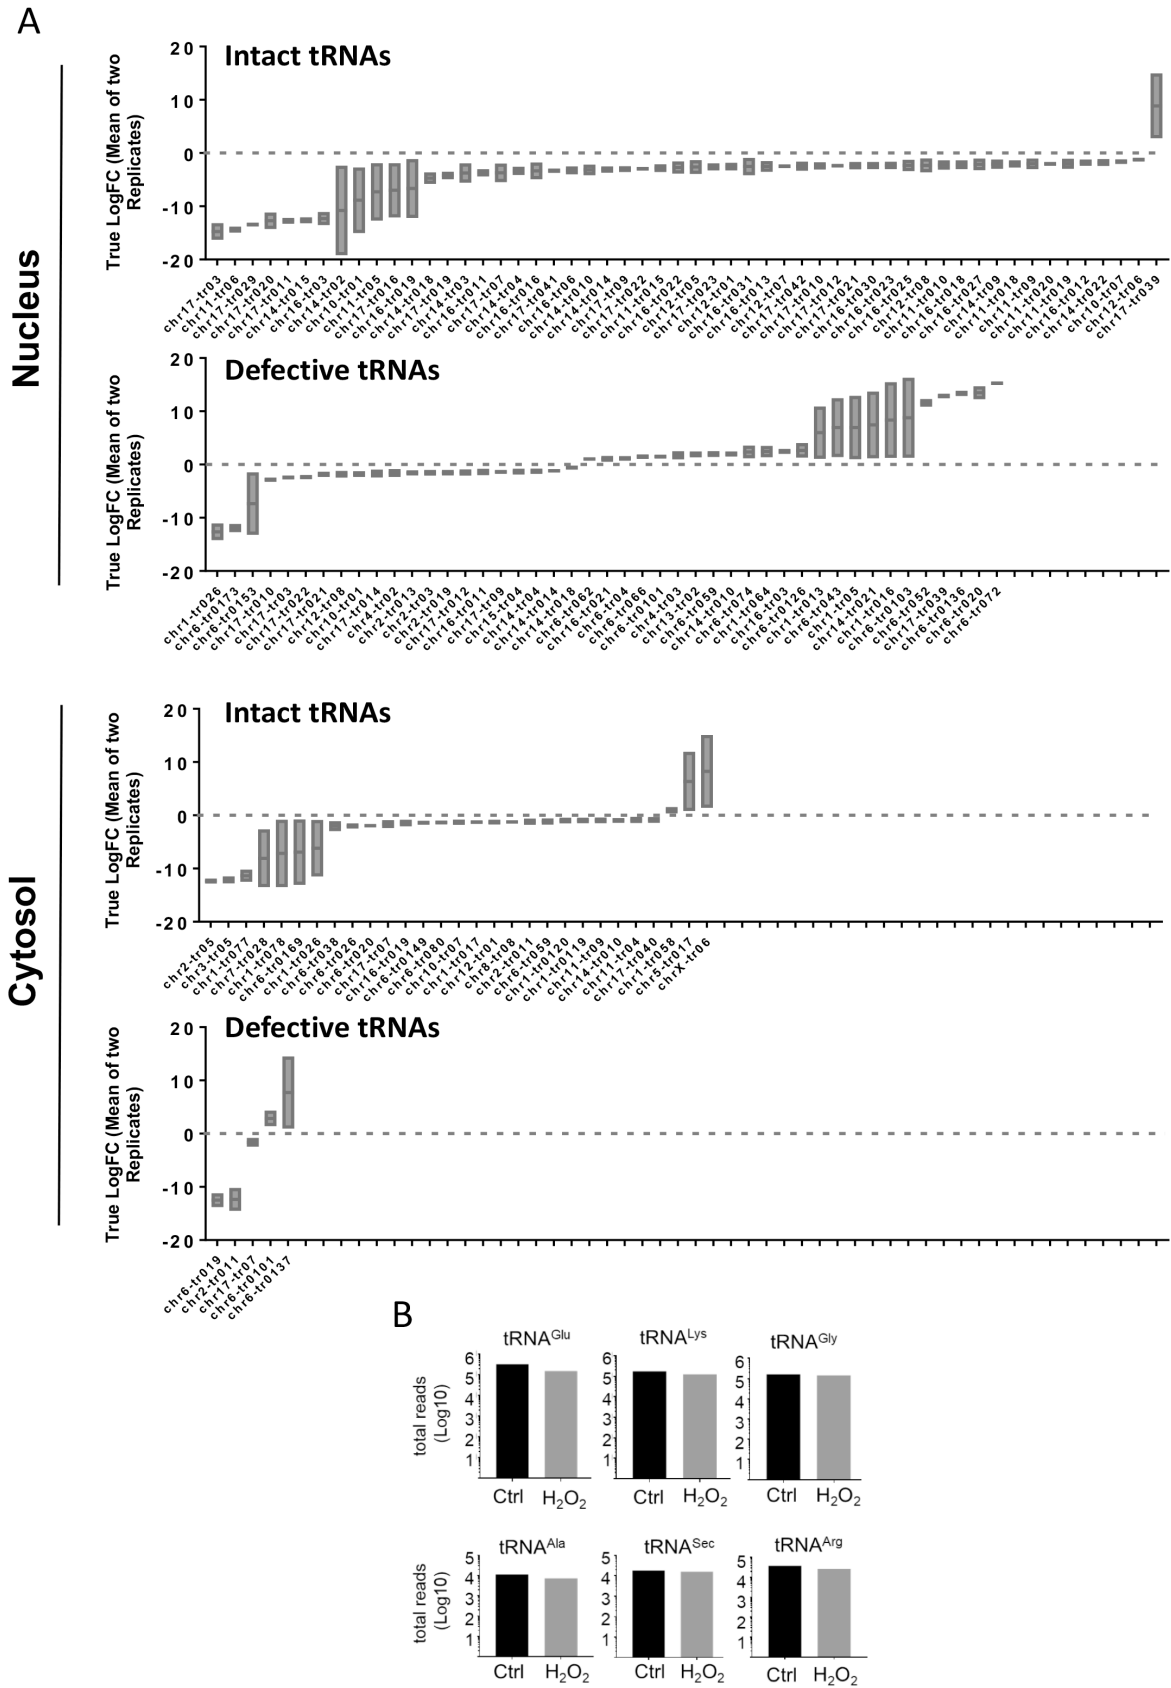

Figure S7 (related to Figure 5 and Table S4). Nuclear and cytosolic distribution of intact and 3' end truncated

tRNA genes that show a consistent (up or down) LogFC >0.75 in each replicate (True LogFC) upon treatment with 5 mM H<sub>2</sub>O<sub>2</sub> for 2 hours in the presence of ActD.

(A) tRNA-specific reads were mapped to the 3' end of the tRNAs and sorted for intact tRNAs (tRNAs with a mature 3' CCA end) and defective tRNAs (tRNA with an incomplete 3'-end). The data were plotted as average of the two replicates with min/max value. Each bar represents one tRNA gene. (see also Table S4). (B) total tRNA read counts in the nucleus or cytoplasm indicate lack of significant tRNA degradation in H<sub>2</sub>O<sub>2</sub>-treated relative to control cells.

Table S1

| Stress                        | Stressor                      | Concentration                     | Time                           | HeLa | Neo-NHDF | CD3-T cells |
|-------------------------------|-------------------------------|-----------------------------------|--------------------------------|------|----------|-------------|
| <b>Oxidative stress</b>       | H <sub>2</sub> O <sub>2</sub> | 0.15, 0.3, 0.6, 1.25, 2.5, 5 (mM) | 0.5, 1, 2, 3, 4 (hours)        | +++  | ++       | ++          |
| <b>Genotoxic stress</b>       | Methylmethane Sulfonate (MMS) | 5 mM                              | 15, 30, 60, 120 (minutes)      | +    | -        | ++          |
| <b>Translation inhibition</b> | Puromycin                     | 3 mM                              | 5, 7.5, 10, 15, 30 (minutes)   | ++   | -        | ++          |
| <b>Metabolic stress</b>       | Glucose deprivation           |                                   | 1, 2, 3, 6, 12, 24, 48 (hours) | -    | -        | -           |
| <b>Viral infection</b>        | IFN $\alpha$                  | 1.15 x 10 <sup>4</sup> U/ $\mu$ L | 1, 2, 3, 6, 12, 24, 48 (hours) | -    | -        | -           |
| <b>Inflammation</b>           | TNF $\alpha$                  | 10 ng/mL                          | 1, 2, 3, 4 (hours)             | -    | -        | -           |
| <b>Heat shock</b>             | 42 °C                         |                                   | 15, 30, 60 (minutes)           | -    | ND       | ND          |
| <b>Low pH</b>                 | NaOH                          | 0.1% (1M)                         | 1, 2, 3 (hours)                | -    | ND       | ND          |
| <b>High pH</b>                | HCl                           | 0.1% (1M)                         | 1, 2, 3 (hours)                | -    | ND       | ND          |
| <b>Osmotic pressure</b>       | Sucrose                       | 300 mM                            | 1, 2, 3 (hours)                | -    | ND       | ND          |
